# Supplementary material for: Reductive Evolution of the Mitochondrial Processing Peptidases of the Unicellular Parasites Trichomonas vaginalis and Giardia intestinalis
Source: PLOS journal article supplement (doi:10.1371/journal.ppat.1000243), 2008-12-18
Supplement: S4 (10.1371/journal.ppat.1000243.s004) [file journal.ppat.1000243.s004]

|                             | $\alpha$                                                                            | $\beta$                                                                              | $\alpha/\beta$                                                                        |
|-----------------------------|-------------------------------------------------------------------------------------|--------------------------------------------------------------------------------------|---------------------------------------------------------------------------------------|
| <i>Saccharomyces</i><br>MPP | 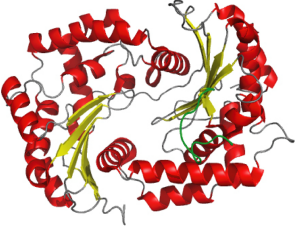   |    |    |
| <i>Trichomonas</i><br>HPP   |  |  |  |
| <i>Giardia</i><br>GPP       | not present                                                                         |  | not present                                                                           |
